# Supplementary material
Source: PubMed Central journal article supplement (PMC7883559)
Supplement: NIHMS1667749-supplement-Supplementary_Material.pdf [file NIHMS1667749-supplement-Supplementary_Material.pdf]

# **SUPPORTING INFORMATION**

## **Base and Nucleotide Excision Repair Pathways in DNA Plasmids Harboring Oxidatively Generated Guanine Lesions**

**Marina Kolbanovskiy, Abraham Aharonoff, Ana Helena Sales, Nicholas E. Geacintov, and Vladimir Shafirovich\***

Chemistry Department, New York University, 31 Washington Place, New York, NY 10003-5180, USA

\*E-mail: vs5@nyu.edu

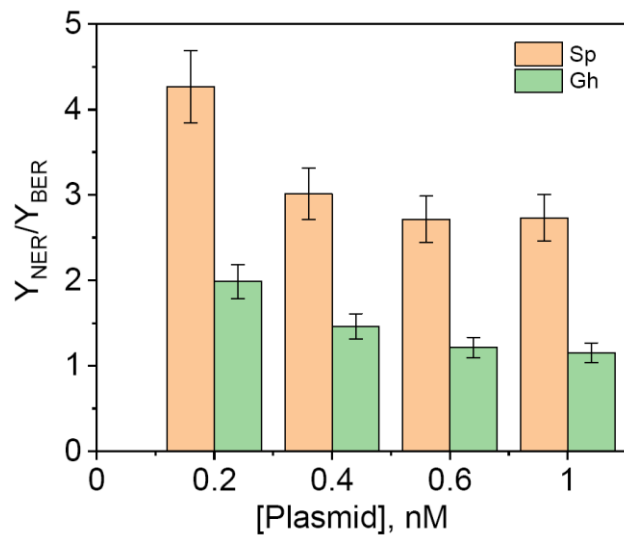

**Figure S1.** Ratios of the yields of BER and NER incision products ( $Y_{NER}/Y_{BER}$ ) from the  $^{32}\text{P}$ -internally labeled covalently closed circular plasmids harboring S-Sp, and Gh lesions as a function of the substrate concentration in the same HeLa cell extract. The results of three independent experiments and their standard deviations are shown.

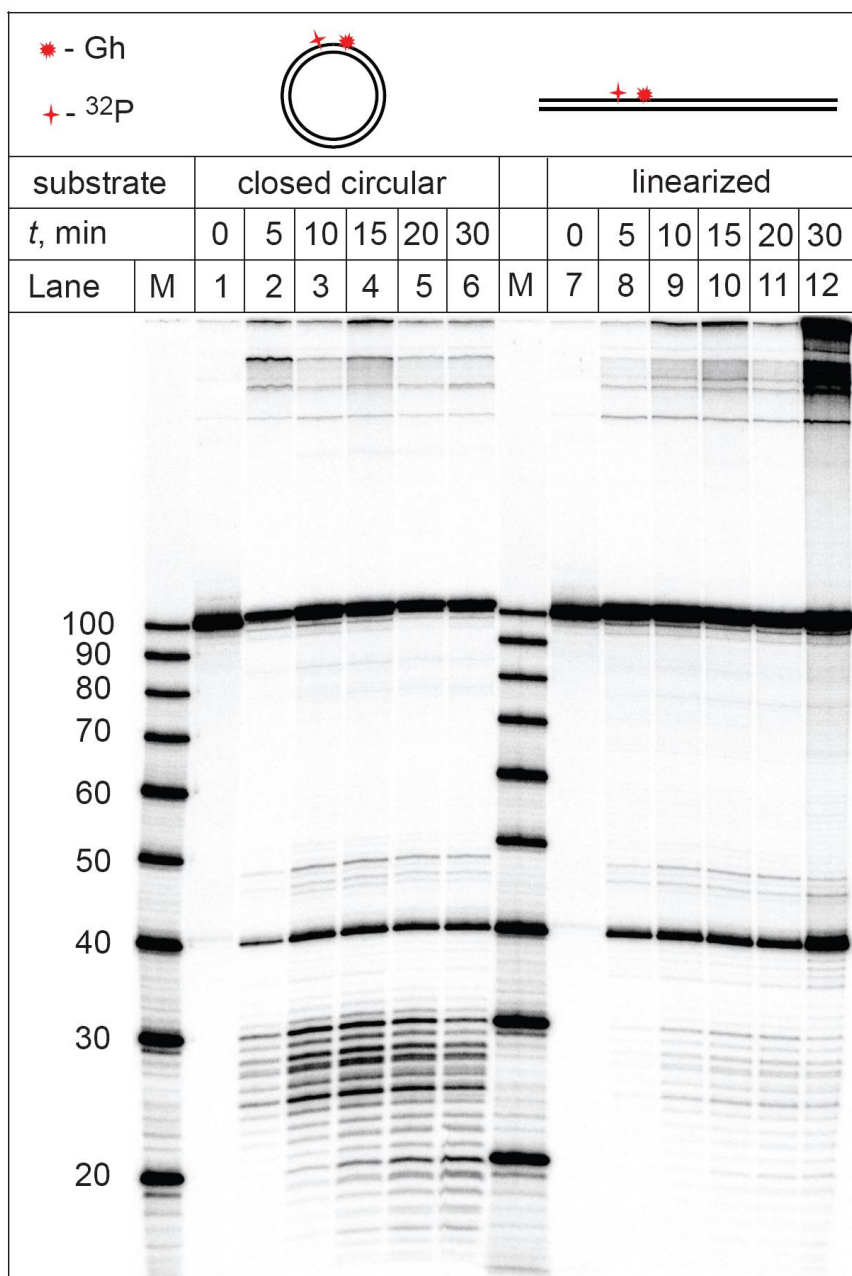

**Figure S2.** BER and NER incisions of the  $^{32}\text{P}$ -internally labeled covalently closed circular and linearized plasmids containing the same molar concentrations of DNA molecules bearing single Gh lesions (0.2 nM) as a function of incubation time in the same HeLa cell extracts (lanes labelled 0, 5, 10, 15, 20, 30 min). Lanes M: oligonucleotide size markers.

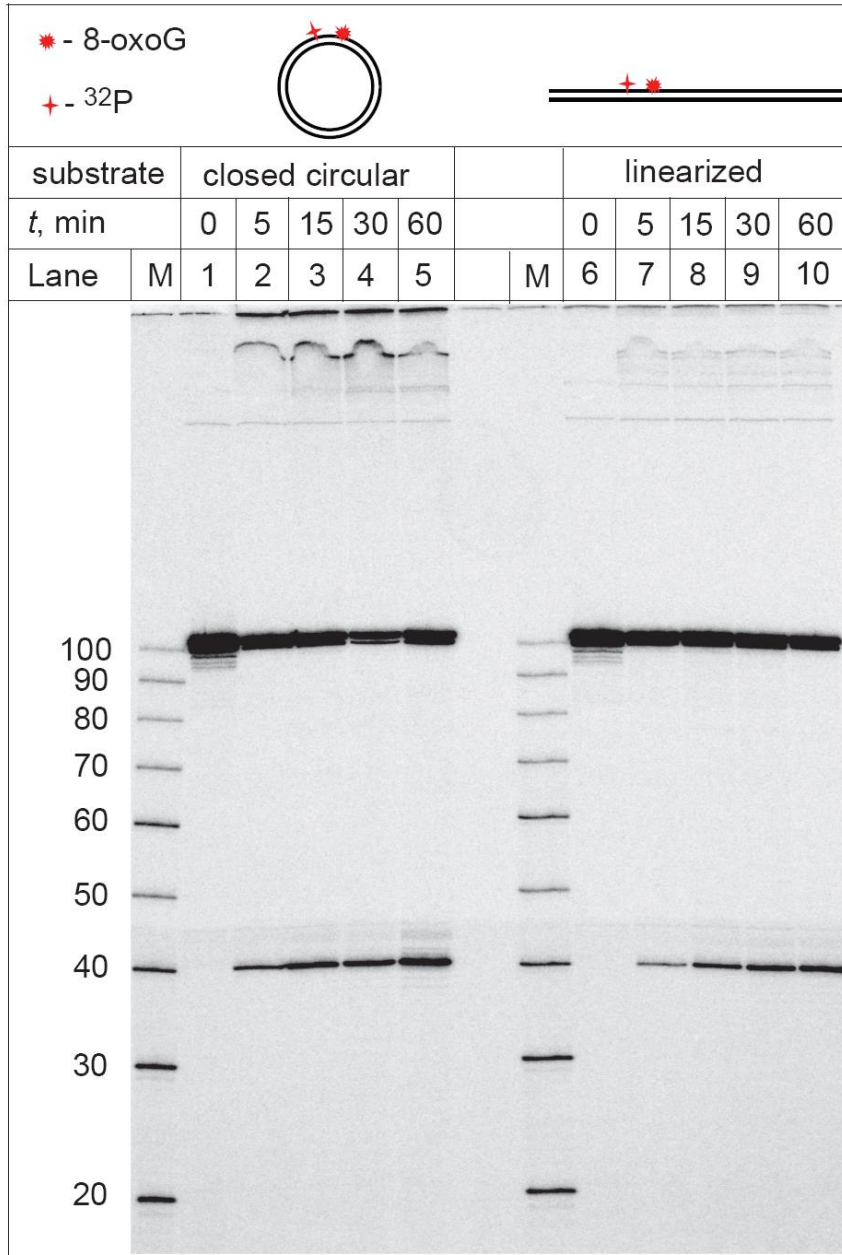

**Figure S3.** BER incisions of the  $^{32}\text{P}$ -internally labeled covalently closed circular and linearized plasmids containing the same molar concentrations of DNA molecules bearing single 8-oxoG lesions (0.2 nM) as a function of incubation time in the same HeLa cell extracts (lanes labelled 0, 5, 15, 30, 60 min). Lanes M: oligonucleotide size markers.

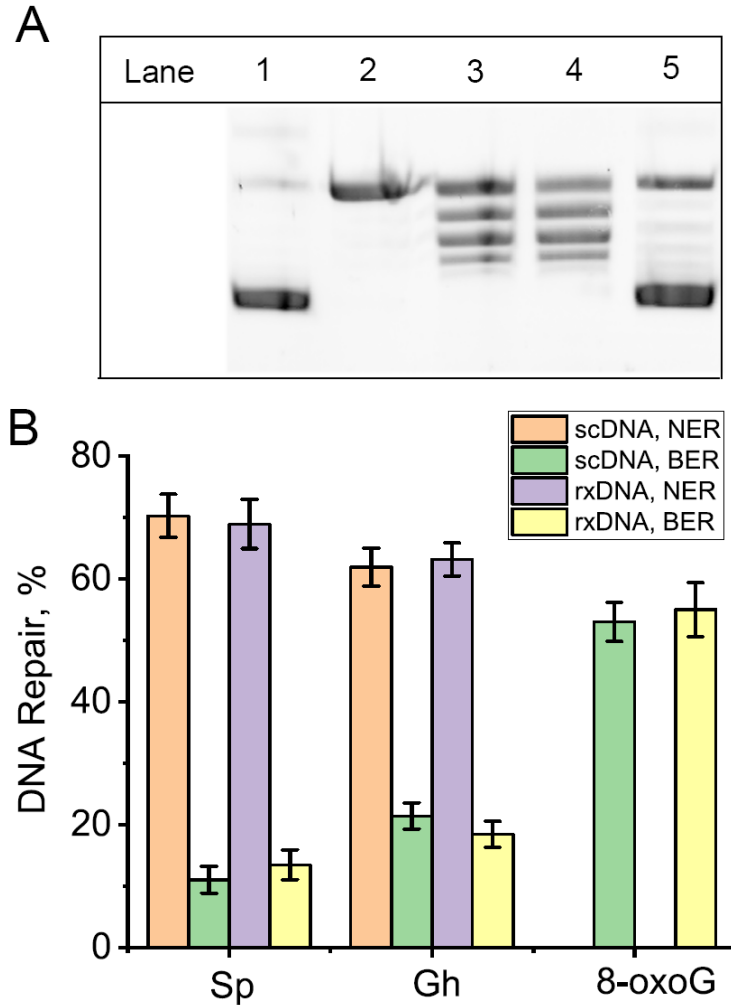

**Figure S4.** (A) Representative 1% agarose gels of the plasmids after staining with ethidium bromide. Lanes: 1 – control supercoiled pUC19NN plasmid, 2 – nicked pUC19NN generated by tandem nicking of pUC19NN with the Nt. BbvCI restriction enzyme, 3 – relaxed forms of Sp-modified pUC19NN generated by ligation of the nicked plasmid, 4 – relaxed forms (lane 3) treated by T5 endonuclease to remove products of incomplete ligation, 5 – supercoiled form of Sp-modified pUC19NN generated by treatment of the relaxed forms (lane 4) with *E. coli* DNA gyrase. (B) The yields of BER and NER incision products of single S-Sp, Gh and 8-oxoG lesions positioned at the same sites in  $^{32}\text{P}$ -internally labeled supercoiled and relaxed closed circular plasmids incubated in HeLa cell extract. The results of three independent experiments and their standard deviations are shown.
